# Supplementary material
Source: PubMed Central journal article supplement (PMC4295546)
Supplement: la504407v_si_001.pdf [file la504407v_si_001.pdf]

## Supplementary Information

# The Effect of Divalent Cation Removal on the Structure of Gram-negative Bacterial Outer Membrane Models

Luke. A. Clifton<sup>1</sup>, Maximilian W. A. Skoda<sup>1</sup>, Anton. P. Le Brun<sup>2</sup>, Filip Ciesielski<sup>1</sup>, Ivan Kuzmenko<sup>3</sup>, Stephen A. Holt<sup>2</sup> and Jeremy H. Lakey<sup>4</sup>.

<sup>1</sup>ISIS Pulsed Neutron and Muon Source, Science and Technology Facilities Council, Rutherford Appleton Laboratory, Harwell Science and Innovation Campus, Didcot, Oxfordshire, OX11 0QX, UK.

<sup>2</sup>Bragg Institute, Australian Nuclear Science and Technology Organisation, Locked Bag 2001, Kirrawee DC, NSW 2232, Australia.

<sup>3</sup>Advanced Photon Source, Argonne National Laboratories, Argonne, Illinois 60439, USA.

<sup>4</sup>Institute for Cell and Molecular Biosciences, Newcastle University, Framlington Place, Newcastle upon Tyne, NE2 4HH, United Kingdom.

### Surface Pressure vs. area isotherms obtained from RaLPS monolayers

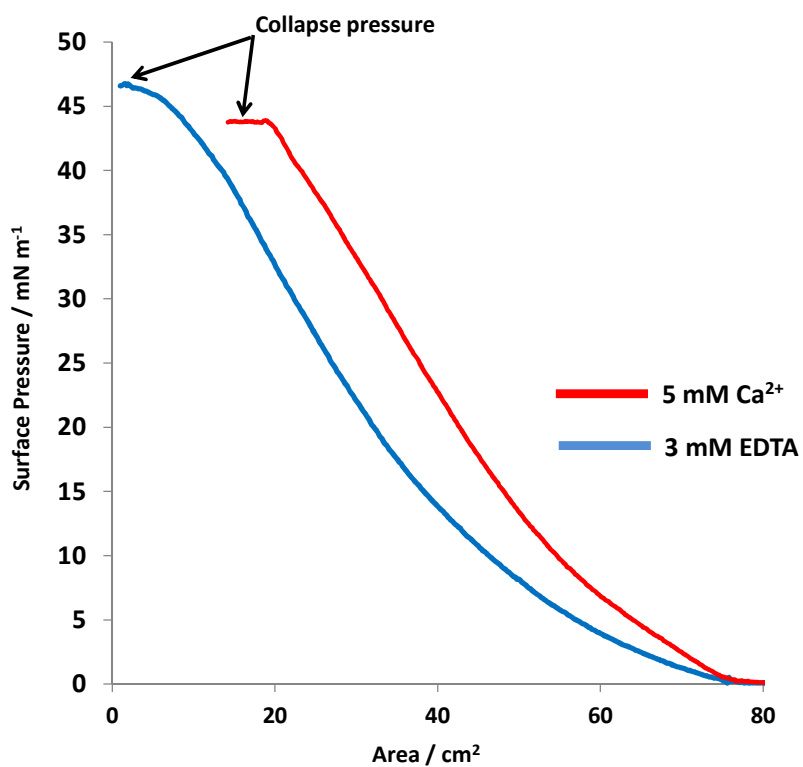

Figure S1, A comparison of the surface pressure vs area isotherms obtained from RaLPS monolayers deposited on liquid surfaces buffered with 20 mM HEPES at pH 7.2 containing either 5mM CaCl<sub>2</sub> (red line) or 3 mM EDTA (blue line). The isotherm areas have been normalised so that the area where the initial increase in surface pressure is the same for both samples for ease of comparison.

**Parameters obtained from model data fitting of reflectivity profiles obtained from asymmetric DPPC/RaLPS bilayers at the silicon/water interface**

**Table S1, Summary of known scattering length densities of the lipid components and the solution subphases.**

| <b>Lipid / Solvent</b>            | <b>Neutron scattering length density (<math>\rho</math>) (<math>10^{-6} \text{ \AA}^{-2}</math>)</b> |
|-----------------------------------|------------------------------------------------------------------------------------------------------|
| D <sub>2</sub> O                  | 6.35                                                                                                 |
| Silicon matched water             | 2.07                                                                                                 |
| H <sub>2</sub> O                  | -0.56                                                                                                |
| Silicon                           | 2.07                                                                                                 |
| Silicon oxide (SiO <sub>2</sub> ) | 3.41                                                                                                 |
| DPPC head group                   | 1.98                                                                                                 |
| h-DPPC tails                      | -0.39                                                                                                |
| d-DPPC tails                      | 7.45                                                                                                 |

**Table S2, Fitting parameters obtained for six isotopic contrast fitting of an asymmetrical 1,2 dipalmitoylphosphatidylcholine (inner leaflet) Ra-LPS (outer leaflet) bilayer in the presence of a solution of 20 mM HEPES pH/D 7.2 5 mM CaCl<sub>2</sub>.**

| Layer                                    | Contrast                                                                                                                                                                                   | Thickness/Å | $\rho / \times 10^{-6} \text{ \AA}^{-2}$                       | % Hydration | Roughness/Å |
|------------------------------------------|--------------------------------------------------------------------------------------------------------------------------------------------------------------------------------------------|-------------|----------------------------------------------------------------|-------------|-------------|
| <b>Layer 1<br/>Silicon<br/>Oxide</b>     | N/A                                                                                                                                                                                        | 14.6±1.2    | 3.41 <sup>nf</sup>                                             | 13.0±2.0    | 3.0±0.2     |
| <b>Layer 2<br/>Inner head-<br/>group</b> | d-PC/Ra-LPS in D <sub>2</sub> O<br>d-PC/ Ra-LPS in SMW<br>d-PC/ Ra-LPS in H <sub>2</sub> O<br>h-PC/ Ra-LPS in D <sub>2</sub> O<br>h-PC/ Ra-LPS in SMW<br>h-PC/ Ra-LPS in H <sub>2</sub> O  | 13.0±0.9    | 4.1±0.3<br>2.1±0.3<br>0.6±1.0<br>4.1±0.3<br>2.1±0.3<br>0.6±1.0 | N/A         | 5.5±1.0     |
| <b>Layer 3<br/>Inner tails</b>           | d-PC/ Ra-LPS<br>h-PC/ Ra-LPS                                                                                                                                                               | 17.0±0.2    | 6.0 <sup>A</sup> ±0.3<br>-0.39 <sup>nf</sup>                   | 4.0±4.0     | As above    |
| <b>Layer 3<br/>Outer tails</b>           | d-PC/ Ra-LPS<br>h-PC/ Ra-LPS                                                                                                                                                               | 14.5±0.7    | 0.96 <sup>A</sup> ±0.2<br>-0.39 <sup>nf</sup>                  | 4.0±4.0     | As above    |
| <b>Layer 4<br/>Outer head-<br/>group</b> | d-PC/ Ra-LPS in D <sub>2</sub> O<br>d-PC/ Ra-LPS in SMW<br>d-PC/ Ra-LPS in H <sub>2</sub> O<br>h-PC/ Ra-LPS in D <sub>2</sub> O<br>h-PC/ Ra-LPS in SMW<br>h-PC/ Ra-LPS in H <sub>2</sub> O | 31.0±1.0    | 4.9±0.5<br>2.7±0.1<br>1.0±0.1<br>4.9±0.5<br>2.1±0.1<br>1.0±0.1 | N/A         | As above    |

A) Value refers to  $(\rho - (\Phi_{\text{water}} \times \rho_{\text{water}}))$  which is fitted simultaneous for H<sub>2</sub>O, SMW and D<sub>2</sub>O solvent isotopic contrasts. Nf refers to a non-fitted parameter.

Table S3, Fitting parameters obtained for six isotopic contrast fitting of an asymmetrical 1,2 dipalmitoylphosphatidylcholine (inner leaflet) Ra-LPS (outer leaflet) bilayer in the presence of a solution of 20 mM HEPES pH/D 7.2 3mM EDTA.

| Layer                                    | Contrast                                                                                                                                                                                   | Thickness/Å | $\rho / \times 10^{-6} \text{ \AA}^{-2}$                        | % Hydration | Roughness/Å |
|------------------------------------------|--------------------------------------------------------------------------------------------------------------------------------------------------------------------------------------------|-------------|-----------------------------------------------------------------|-------------|-------------|
| <b>Layer 1<br/>Silicon<br/>Oxide</b>     | N/A                                                                                                                                                                                        | 13.9±5.0    | 3.41 <sup>nf</sup>                                              | 12.0±2.0    | 2.9±0.2     |
| <b>Layer 2<br/>Inner head-<br/>group</b> | d-PC/Ra-LPS in D <sub>2</sub> O<br>d-PC/ Ra-LPS in SMW<br>d-PC/ Ra-LPS in H <sub>2</sub> O<br>h-PC/ Ra-LPS in D <sub>2</sub> O<br>h-PC/ Ra-LPS in SMW<br>h-PC/ Ra-LPS in H <sub>2</sub> O  | 15.4±4.0    | 3.6±0.8<br>2.7±0.4<br>1.9±0.5<br>3.6±0.8<br>2.7±0.4<br>1.9±0.5  | N/A         | 8.4±1.2     |
| <b>Layer 3<br/>Inner tails</b>           | d-PC/ Ra-LPS<br>h-PC/ Ra-LPS                                                                                                                                                               | 15.9±1.0    | 4.5 <sup>A</sup> ±0.1<br>-0.39 <sup>nf</sup>                    | 4±0.4       | As above    |
| <b>Layer 3<br/>Outer tails</b>           | d-PC/ Ra-LPS<br>h-PC/ Ra-LPS                                                                                                                                                               | 11.0±5.0    | 2.3 <sup>A</sup> ±0.3<br>-0.39 <sup>nf</sup>                    | 4±4         | As above    |
| <b>Layer 4<br/>Outer head-<br/>group</b> | d-PC/ Ra-LPS in D <sub>2</sub> O<br>d-PC/ Ra-LPS in SMW<br>d-PC/ Ra-LPS in H <sub>2</sub> O<br>h-PC/ Ra-LPS in D <sub>2</sub> O<br>h-PC/ Ra-LPS in SMW<br>h-PC/ Ra-LPS in H <sub>2</sub> O | 28.4±1.2    | 5.2±0.6<br>2.4±0.07<br>0.9±0.1<br>5.2±0.6<br>2.4±0.1<br>0.9±0.1 | N/A         | As above    |

A) Value refers to  $(\rho - (\Phi_{\text{water}} \times \rho_{\text{water}}))$  which is fitted simultaneous for H<sub>2</sub>O, SMW and D<sub>2</sub>O solvent isotopic contrasts. Nf refers to a non-fitted parameter.

### Mixing control measurements.

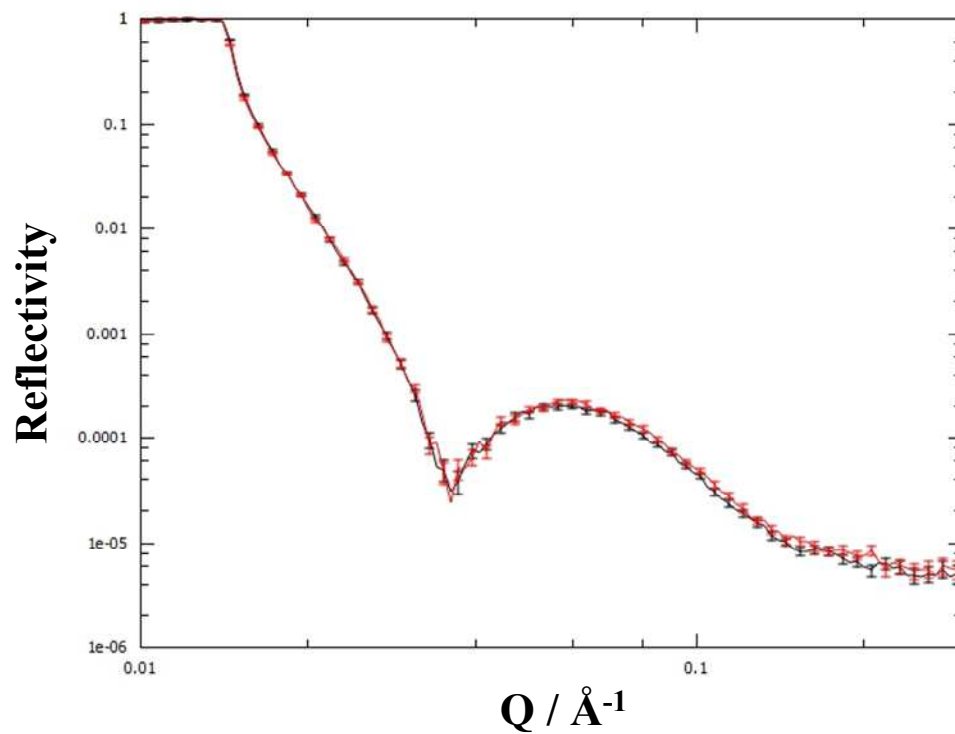

Figure S2, Bilayer mixing control measurements. The experimental neutron reflectometry profiles obtained from an asymmetrically deposited d-DPPC/Ra-LPS bilayer in 20 mM HEPES D<sub>2</sub>O buffer at a pD of 7.2 containing 5 mM CaCl<sub>2</sub> after 22.5 ml (red) and 90 ml (black) of solution was passed through the sample cell.

### Calculation of RaLPS : Ca<sup>2+</sup> stoichiometry from X-ray reflectivity data.

Upon addition of EDTA to the Ca<sup>2+</sup> containing sub-phase, the SLD of the inner headgroups is reduced from  $14 \times 10^{-6}$  to  $13 \times 10^{-6} \text{ \AA}^{-2}$  with the change attributed to the removal of calcium ions. One can convert the SLD values to electron density [Eqn S1] and therefore calculate the number of calcium ions removed from per RaLPS molecule.

$$\rho_e = SLD / r_e \quad \text{S1}$$

where  $r_e$  is the classical electron radius,  $2.82 \times 10^{-5} \text{ m}$ , and  $\rho_e$  is the electron density,  $e/\text{\AA}^{-3}$ . The change in SLD therefore corresponds to a  $\Delta\rho_e$  of  $0.0355 e/\text{\AA}^3$ . An area per RaLPS of  $128 \text{ \AA}^2$ , combined with a layer thickness of  $23.5 \text{ \AA}$  (Table 1) results in a volume of  $3008 \text{ \AA}^3$  per headgroup. A change in  $\rho_e$  of  $0.036$  over this volume corresponds to a reduction of  $106.8$  electrons per headgroup. Given the atomic number of calcium,  $20$ , this implies that on average there were  $5.3 \text{ Ca}^{2+}$  ions per headgroup. Using an ionic radius of  $118 \text{ pm}$  for  $\text{Ca}^{2+}$ , the ionic volume is  $2.19 \text{ \AA}^3$  compared to a volume of  $30 \text{ \AA}^3$  for a single water molecule. We have therefore neglected the impact that the slight increase in the number of water molecules would have on the electron density.
